# Supplementary material for: Global mapping of RNA-chromatin contacts reveals a proximity-dominated connectivity model for ncRNA-gene interactions
Source: PubMed Central journal article supplement (PMC10539311; doi:10.1038/s41467-023-41848-9), 2023-09-28
Supplement: 41467_2023_41848_MOESM14_ESM.pdf [file 41467_2023_41848_MOESM14_ESM.pdf]

## Reporting Summary

Nature Portfolio wishes to improve the reproducibility of the work that we publish. This form provides structure for consistency and transparency in reporting. For further information on Nature Portfolio policies, see our [Editorial Policies](#) and the [Editorial Policy Checklist](#).

### Statistics

For all statistical analyses, confirm that the following items are present in the figure legend, table legend, main text, or Methods section.

n/a Confirmed

- The exact sample size ( $n$ ) for each experimental group/condition, given as a discrete number and unit of measurement
- A statement on whether measurements were taken from distinct samples or whether the same sample was measured repeatedly
- The statistical test(s) used AND whether they are one- or two-sided  
*Only common tests should be described solely by name; describe more complex techniques in the Methods section.*
- A description of all covariates tested
- A description of any assumptions or corrections, such as tests of normality and adjustment for multiple comparisons
- A full description of the statistical parameters including central tendency (e.g. means) or other basic estimates (e.g. regression coefficient) AND variation (e.g. standard deviation) or associated estimates of uncertainty (e.g. confidence intervals)
- For null hypothesis testing, the test statistic (e.g.  $F$ ,  $t$ ,  $r$ ) with confidence intervals, effect sizes, degrees of freedom and  $P$  value noted  
*Give  $P$  values as exact values whenever suitable.*
- For Bayesian analysis, information on the choice of priors and Markov chain Monte Carlo settings
- For hierarchical and complex designs, identification of the appropriate level for tests and full reporting of outcomes
- Estimates of effect sizes (e.g. Cohen's  $d$ , Pearson's  $r$ ), indicating how they were calculated

*Our web collection on [statistics for biologists](#) contains articles on many of the points above.*

### Software and code

Policy information about [availability of computer code](#)

Data collection

Cell Profiler (3.1.8) was used for obtaining maximum intensity projection of microscopy images

Data analysis

All analysis tools used are listed in the text. Custom analysis code was deposited on github: <https://github.com/straightlab/charseq-pipelines>, <https://github.com/straightlab/chartools>, <https://github.com/straightlab/tagtools>

For manuscripts utilizing custom algorithms or software that are central to the research but not yet described in published literature, software must be made available to editors and reviewers. We strongly encourage code deposition in a community repository (e.g. GitHub). See the Nature Portfolio [guidelines for submitting code & software](#) for further information.

### Data

Policy information about [availability of data](#)

All manuscripts must include a [data availability statement](#). This statement should provide the following information, where applicable:

- Accession codes, unique identifiers, or web links for publicly available datasets
- A description of any restrictions on data availability
- For clinical datasets or third party data, please ensure that the statement adheres to our [policy](#)

A data availability statement has been added to the manuscript and all data is publicly accessible as GEO accession GSE240435 and in the github repositories <https://github.com/straightlab/charseq-pipelines>, <https://github.com/straightlab/chartools>, <https://github.com/straightlab/tagtools>

## Research involving human participants, their data, or biological material

Policy information about studies with [human participants or human data](#). See also policy information about [sex, gender \(identity/presentation\), and sexual orientation](#) and [race, ethnicity and racism](#).

|                                                                    |     |
|--------------------------------------------------------------------|-----|
| Reporting on sex and gender                                        | N/A |
| Reporting on race, ethnicity, or other socially relevant groupings | N/A |
| Population characteristics                                         | N/A |
| Recruitment                                                        | N/A |
| Ethics oversight                                                   | N/A |

Note that full information on the approval of the study protocol must also be provided in the manuscript.

## Field-specific reporting

Please select the one below that is the best fit for your research. If you are not sure, read the appropriate sections before making your selection.

Life sciences  Behavioural & social sciences  Ecological, evolutionary & environmental sciences

For a reference copy of the document with all sections, see [nature.com/documents/nr-reporting-summary-flat.pdf](https://www.nature.com/documents/nr-reporting-summary-flat.pdf)

## Life sciences study design

All studies must disclose on these points even when the disclosure is negative.

|                 |                                                                                                                                                                                                                                                                                                                                              |
|-----------------|----------------------------------------------------------------------------------------------------------------------------------------------------------------------------------------------------------------------------------------------------------------------------------------------------------------------------------------------|
| Sample size     | Balanced number of replicates were used across cell lines. For ChAR-seq, we used 2 replicates per cell line, as standard for assays requiring ultra deep sequencing (e.g. HiC, etc.).                                                                                                                                                        |
| Data exclusions | All exclusion rules were described in the text. For ChAR-seq differential maps, RNA-DNA contacts with fewer than a preset number of reads (less than 2 samples with at least 10 reads) were removed. This follows standard recommendations for prefiltering in differential RNA-seq (e.g. DESeq2), to limit the number of hypothesis tested. |
| Replication     | Replication was assessed by comparing inter-replicates vs intra-replicate correlations.                                                                                                                                                                                                                                                      |
| Randomization   | Not applicable. The data in the manuscript compared two cell states (ES vs DE) with appropriate controls. Randomization would not have been appropriate for the data type.                                                                                                                                                                   |
| Blinding        | All tests were done through automated computational routines and did not involve any form of manual scoring. For experiments, the only groups were cell lines pre- and post- differentiation and those have to be known by the experimenter to apply cell specific protocols thus would not be appropriate for blinding.                     |

## Reporting for specific materials, systems and methods

We require information from authors about some types of materials, experimental systems and methods used in many studies. Here, indicate whether each material, system or method listed is relevant to your study. If you are not sure if a list item applies to your research, read the appropriate section before selecting a response.

### Materials & experimental systems

| n/a                                 | Involved in the study                                     |
|-------------------------------------|-----------------------------------------------------------|
| <input type="checkbox"/>            | <input checked="" type="checkbox"/> Antibodies            |
| <input type="checkbox"/>            | <input checked="" type="checkbox"/> Eukaryotic cell lines |
| <input checked="" type="checkbox"/> | <input type="checkbox"/> Palaeontology and archaeology    |
| <input checked="" type="checkbox"/> | <input type="checkbox"/> Animals and other organisms      |
| <input checked="" type="checkbox"/> | <input type="checkbox"/> Clinical data                    |
| <input checked="" type="checkbox"/> | <input type="checkbox"/> Dual use research of concern     |
| <input checked="" type="checkbox"/> | <input type="checkbox"/> Plants                           |

### Methods

| n/a                                 | Involved in the study                           |
|-------------------------------------|-------------------------------------------------|
| <input checked="" type="checkbox"/> | <input type="checkbox"/> ChIP-seq               |
| <input checked="" type="checkbox"/> | <input type="checkbox"/> Flow cytometry         |
| <input checked="" type="checkbox"/> | <input type="checkbox"/> MRI-based neuroimaging |

## Antibodies

|                 |                                      |
|-----------------|--------------------------------------|
| Antibodies used | Goat anti-Sox17, R&D Systems, AF1924 |
|-----------------|--------------------------------------|

Rabbit anti-Nanog, Bethyl Labs, A300-397A  
Rabbit anti-Sox2, Cell Signaling, 3579T  
Rabbit anti-FoxA2, EMD Millipore, 07-633  
Goat anti-Rabbit Alexa-647, Thermo-Fisher, A32733  
Donkey anti-Goat Alexa-568, Thermo-Fisher, A11057

Validation

Validation information for antibodies was performed by the manufacturers

## Eukaryotic cell lines

Policy information about [cell lines and Sex and Gender in Research](#)

Cell line source(s)

Human H9 embryonic stem cells, WiCell, WA09

Authentication

Authentication performed by WiCell

Mycoplasma contamination

Mycoplasma testing and characterization performed by WiCell

Commonly misidentified lines  
(See [ICLAC](#) register)*Name any commonly misidentified cell lines used in the study and provide a rationale for their use.*
